# Supplementary material for: Nuclearity control of manganese polymers dependent on structural differences in the coligands and magnetic properties studies
Source: Royal Society of Chemistry journal article supplement (doi:10.1039/c3ce41553h), 2014-01-01
Supplement: c3ce41553h.pdf [file c3ce41553h.pdf]

## Supporting Information

### Nuclearity Control of Manganese Polymers dependent on Structural Differences in the Coligands and Magnetic Properties Studies

Huijun Li,<sup>ab</sup> Zhouqing Xu,<sup>ab</sup> Bei Zhao,<sup>a</sup> Yanyuan Jia,<sup>a</sup> Ran Ding,<sup>a</sup> Hongwei Hou\*<sup>a</sup> and Yaoting Fan<sup>a</sup>

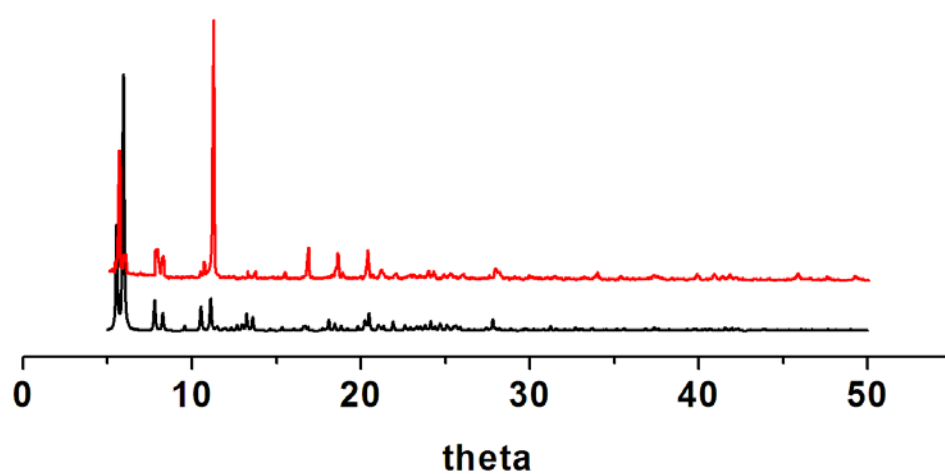

Figure S1: The PXRD patterns of polymer 1.

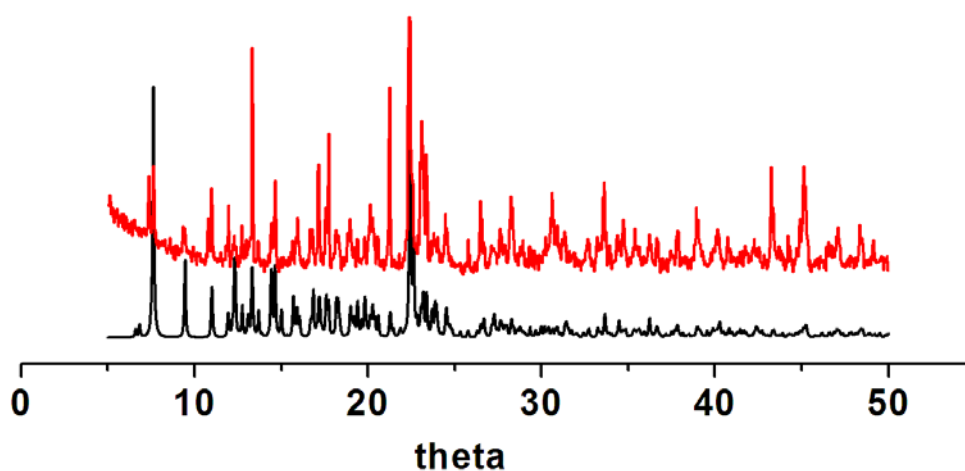

Figure S2: The PXRD patterns of polymer 2.

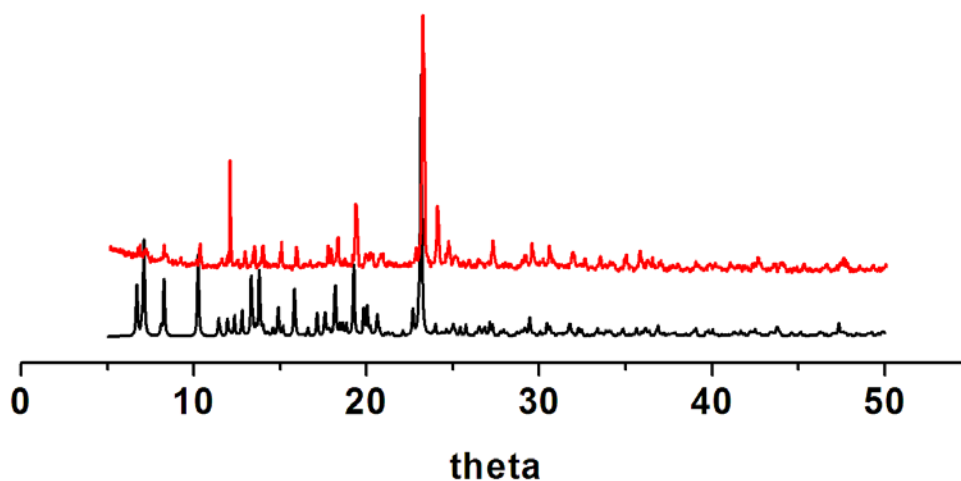

Figure S3: The PXR D patterns of polymer 3.

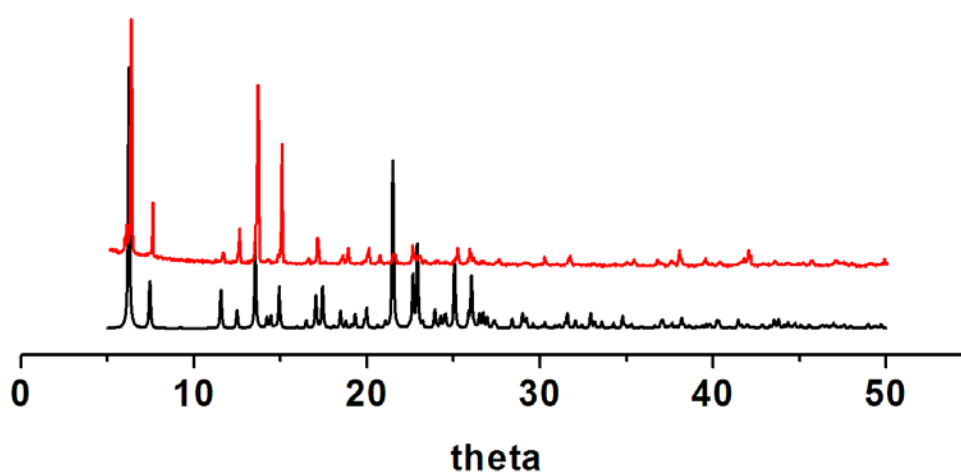

Figure S4: The PXR D patterns of polymer 4.

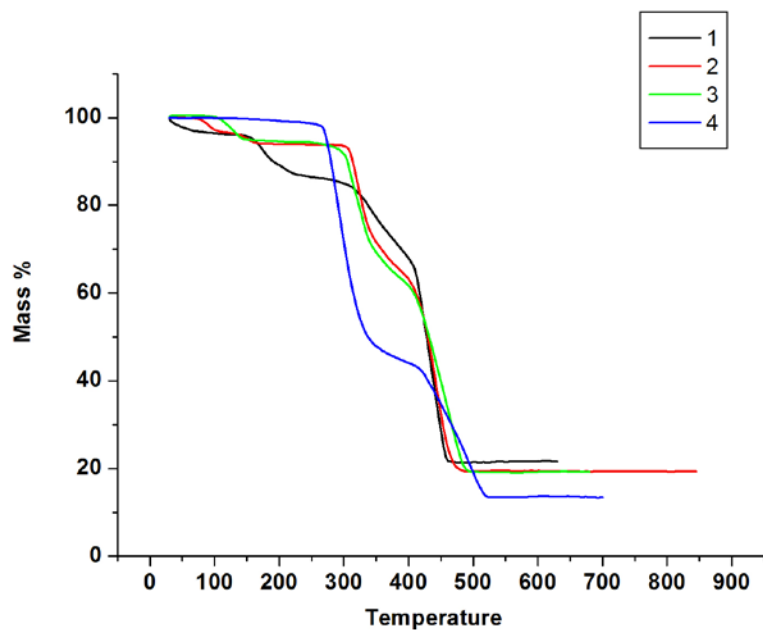

Figure S5: The TG curves of polymers 1-4.

#### Thermal analysis:

The thermostability of polymers 1-4 was estimated by thermogravimetric analysis (TGA). Polymer 1 shows a weight loss of 13.87% from room temperature to 174.9 °C corresponding to the release of water molecules (13.32%). For polymer 2, a weight loss of 6.09% occurs from 73 °C to 153.1 °C attributed to the release of four water molecules (calcd 5.88%). The overall framework of 3 begins to collapse at 96.5 °C and the water molecules (obsd, 6%, calcd, 5.9%) are lost during the storage. In the case of anhydrous polymer 4, no obvious weight loss was observed until 278.3 °C.

**Table S1.** Crystal data and structure refinement for complexes **1-4**<sup>a</sup>

| compound                                  | 1                                                                               | 2                                                                               | 3                                                                               | 4                                                               |
|-------------------------------------------|---------------------------------------------------------------------------------|---------------------------------------------------------------------------------|---------------------------------------------------------------------------------|-----------------------------------------------------------------|
| Formula                                   | C <sub>58</sub> H <sub>72</sub> Mn <sub>4</sub> N <sub>28</sub> O <sub>32</sub> | C <sub>43</sub> H <sub>52</sub> Mn <sub>3</sub> N <sub>10</sub> O <sub>22</sub> | C <sub>42</sub> H <sub>50</sub> Mn <sub>3</sub> N <sub>10</sub> O <sub>22</sub> | C <sub>25</sub> H <sub>27</sub> MnN <sub>5</sub> O <sub>9</sub> |
| fw                                        | 1893.20                                                                         | 1225.77                                                                         | 1211.74                                                                         | 596.46                                                          |
| T/K                                       | 293(2)                                                                          | 293(2)                                                                          | 293(2)                                                                          | 293(2)                                                          |
| λ (Mo Kα), Å                              | 0.71073                                                                         | 0.71073                                                                         | 0.71073                                                                         | 0.71073                                                         |
| cryst syst                                | <i>orthorhombic</i>                                                             | <i>triclinic</i>                                                                | <i>triclinic</i>                                                                | <i>orthorhombic</i>                                             |
| space group                               | <i>Pnma</i>                                                                     | <i>P-1</i>                                                                      | <i>P-1</i>                                                                      | <i>Pna21</i>                                                    |
| a/Å                                       | 15.365(3)                                                                       | 13.519(3)                                                                       | 13.527(3)                                                                       | 28.334(6)                                                       |
| b/Å                                       | 31.833(6)                                                                       | 14.955(3)                                                                       | 14.982(3)                                                                       | 13.063(3)                                                       |
| c/Å                                       | 16.779(3)                                                                       | 15.356(3)                                                                       | 15.036(3)                                                                       | 6.7989(14)                                                      |
| α/deg                                     | 90                                                                              | 102.35(3)                                                                       | 62.09(3)                                                                        | 90                                                              |
| β/deg                                     | 90                                                                              | 109.47(3)                                                                       | 67.21(3)                                                                        | 90                                                              |
| γ/deg                                     | 90                                                                              | 110.99(3)                                                                       | 74.82(3)                                                                        | 90                                                              |
| V/Å <sup>3</sup>                          | 8207(3)                                                                         | 2529.3(9)                                                                       | 2470.4(9)                                                                       | 2516.4(9)                                                       |
| Z                                         | 4                                                                               | 2                                                                               | 2                                                                               | 4                                                               |
| D <sub>calcd.</sub> (g·cm <sup>-3</sup> ) | 1.532                                                                           | 1.609                                                                           | 1.629                                                                           | 1.574                                                           |
| F(000)                                    | 3888                                                                            | 1262                                                                            | 1246                                                                            | 1160                                                            |
| Reflections<br>collected                  | 7356/7356                                                                       | 21412 / 8864                                                                    | 20504 / 8600                                                                    | 11500 / 4345                                                    |
| R(int)                                    | 0.0000                                                                          | 0.0237                                                                          | 0.0528                                                                          | 0.0427                                                          |
| 2θ <sub>max</sub> (°)                     | 25.00                                                                           | 25.00                                                                           | 25.00                                                                           | 25.50                                                           |
| GOF                                       | 1.104                                                                           | 1.089                                                                           | 1.067                                                                           | 1.037                                                           |
| R <sub>I</sub> (I > 2σ(I))                | 0.0878                                                                          | 0.0402                                                                          | 0.0772                                                                          | 0.0435                                                          |
| wR <sub>2</sub> (all data)                | 0.2171                                                                          | 0.1098                                                                          | 0.2168                                                                          | 0.1107                                                          |

<sup>a</sup>  $R_1 = \frac{\sum ||F_o| - |F_c||}{\sum |F_o|}$ . <sup>b</sup>  $wR_2 = [\sum w(F_o^2 - F_c^2)^2 / \sum w(F_o^2)^2]^{1/2}$ .

**Table S2.** Selected bond lengths /Å and angles /° for **1-4**

| Complex 1           |            |                     |           |
|---------------------|------------|---------------------|-----------|
| Mn(1)-O(2)          | 2.156(4)   | Mn(1)-N(9)          | 2.293(4)  |
| Mn(1)-O(12)         | 2.218(4)   | Mn(1)-N(11)         | 2.277(4)  |
| Mn(1)-N(10)         | 2.310(5)   | Mn(1)-N(15)#1       | 2.319(5)  |
| Mn(2)-O(6)          | 2.115(7)   | Mn(2)-O(6)          | 2.115(7)  |
| Mn(2)-O(1)          | 2.151(4)   | Mn(2)-O(15)         | 2.169(5)  |
| Mn(2)-O(13)         | 2.193(4)   | Mn(2)-N(8)          | 2.193(5)  |
| Mn(2)-N(5)          | 2.394(5)   | O(2)-Mn(1)-O(12)    | 84.19(17) |
| O(2)-Mn(1)-N(11)    | 110.72(17) | O(12)-Mn(1)-N(11)   | 89.83(17) |
| O(2)-Mn(1)-N(9)     | 108.55(17) | O(12)-Mn(1)-N(9)    | 92.06(18) |
| N(11)-Mn(1)-N(9)    | 140.67(17) | N(11)-Mn(1)-N(10)   | 70.96(16) |
| O(2)-Mn(1)-N(10)    | 171.63(16) | O(12)-Mn(1)-N(10)   | 87.64(16) |
| N(9)-Mn(1)-N(10)    | 69.88(15)  | O(2)-Mn(1)-N(15)#1  | 93.06(17) |
| O(12)-Mn(1)-N(15)#1 | 173.86(17) | N(11)-Mn(1)-N(15)#1 | 86.00(16) |
| N(9)-Mn(1)-N(15)#1  | 94.03(17)  | N(10)-Mn(1)-N(15)#1 | 95.25(17) |
| O(6)-Mn(2)-O(15)    | 83.1(3)    | O(1)-Mn(2)-O(15)    | 104.1(2)  |
| O(6)-Mn(2)-O(13)    | 162.7(3)   | O(1)-Mn(2)-O(13)    | 98.08(16) |
| O(15)-Mn(2)-O(13)   | 82.6(2)    | O(6)-Mn(2)-N(8)     | 103.0(3)  |
| O(1)-Mn(2)-N(8)     | 86.84(17)  | O(15)-Mn(2)-N(8)    | 167.1(2)  |
| O(13)-Mn(2)-N(8)    | 89.14(18)  | O(6)-Mn(2)-N(5)     | 84.3(2)   |
| O(1)-Mn(2)-N(5)     | 157.83(18) | O(15)-Mn(2)-N(5)    | 97.8(2)   |
| O(13)-Mn(2)-N(5)    | 87.91(16)  | N(8)-Mn(2)-N(5)     | 71.86(17) |
| O(1)-Co(1)-N(1)     | 98.24(12)  | O(6)-Mn(2)-O(1)     | 94.9(2)   |
| Complex 2           |            |                     |           |
| Mn(1)-O(1)          | 2.1482(19) | Mn(1)-O(1)#3        | 2.186(2)  |
| Mn(1)-O(7)#4        | 2.231(2)   | Mn(1)-O(6)#4        | 2.244(2)  |
| Mn(1)-O(8)          | 2.257(2)   | Mn(1)-O(9)          | 2.298(2)  |
| Mn(2)-O(20)#3       | 2.172(2)   | Mn(2)-O(15)#4       | 2.179(2)  |
| Mn(2)-O(19)         | 2.248(2)   | Mn(2)-N(10)         | 2.249(2)  |
| Mn(3)-O(21)#3       | 2.114(2)   | Mn(3)-O(14)         | 2.131(3)  |
| Mn(3)-O(13)         | 2.201(2)   | Mn(3)-O(15)#4       | 2.224(2)  |
| Mn(3)-N(7)          | 2.262(2)   | Mn(3)-O(16)#4       | 2.345(2)  |
| O(1)-Mn(1)-O(1)#3   | 76.14(9)   | O(1)-Mn(1)-O(7)#4   | 96.44(8)  |
| O(1)#3-Mn(1)-O(7)#4 | 108.75(9)  | O(1)-Mn(1)-O(6)#4   | 147.18(8) |
| O(1)#3-Mn(1)-O(6)#4 | 92.22(9)   | O(7)#4-Mn(1)-O(6)#4 | 57.91(8)  |
| O(1)-Mn(1)-O(8)     | 113.29(9)  | O(1)#3-Mn(1)-O(8)   | 91.71(8)  |
| O(7)#4-Mn(1)-O(8)   | 147.43(8)  | O(6)#4-Mn(1)-O(8)   | 97.40(9)  |
| O(1)-Mn(1)-O(9)     | 110.33(9)  | O(1)#3-Mn(1)-O(9)   | 148.04(8) |
| O(7)#4-Mn(1)-O(9)   | 101.69(9)  | O(6)#4-Mn(1)-O(9)   | 95.84(9)  |
| O(8)-Mn(1)-O(9)     | 56.62(8)   |                     |           |
| Complex 3           |            |                     |           |
| Mn(1)-O(10)         | 2.143(4)   | Mn(1)-O(5)          | 2.172(4)  |

|                       |            |                       |            |
|-----------------------|------------|-----------------------|------------|
| Mn(1)-O(20)           | 2.193(4)   | Mn(1)-O(4)#2          | 109.88(11) |
| Mn(1)-N(1)            | 2.225(4)   | Mn(1)-O(19)           | 2.232(4)   |
| Mn(2)-O(11)           | 2.066(4)   | Mn(2)-O(1)#3          | 2.158(4)   |
| Mn(2)-O(6)#1          | 2.174(4)   | Mn(2)-N(4)            | 2.251(5)   |
| Mn(2)-O(4)#2          | 2.303(4)   | Mn(2)-O(3)#2          | 2.323(4)   |
| Mn(3)-O(2)            | 2.076(4)   | Mn(3)-O(15)#1         | 2.103(5)   |
| Mn(3)-O(21)           | 2.117(5)   | Mn(3)-O(13)#4         | 2.143(6)   |
| Mn(3)-O(12)#4         | 2.238(6)   | Mn(3)-C(16)#4         | 2.541(8)   |
| O(10)-Mn(1)-O(5)      | 174.24(16) | O(10)-Mn(1)-O(20)     | 85.34(19)  |
| O(5)-Mn(1)-O(20)      | 89.81(17)  | O(10)-Mn(1)-O(4)#2    | 90.08(17)  |
| O(5)-Mn(1)-O(4)#2     | 94.42(16)  | O(20)-Mn(1)-O(4)#2    | 172.67(16) |
| O(10)-Mn(1)-N(1)      | 89.97(17)  | O(5)-Mn(1)-N(1)       | 93.41(16)  |
| O(20)-Mn(1)-N(1)      | 93.06(18)  | O(4)#2-Mn(1)-N(1)     | 92.65(17)  |
| O(10)-Mn(1)-O(19)     | 88.12(15)  | O(5)-Mn(1)-O(19)      | 88.50(13)  |
| O(20)-Mn(1)-O(19)     | 86.79(16)  | O(4)#2-Mn(1)-O(19)    | 87.34(16)  |
| N(1)-Mn(1)-O(19)      | 178.09(16) | O(11)-Mn(2)-O(1)#3    | 122.84(17) |
| O(11)-Mn(2)-O(6)#1    | 88.48(17)  | O(1)#3-Mn(2)-O(6)#1   | 83.71(16)  |
| O(11)-Mn(2)-N(4)      | 88.04(18)  | O(1)#3-Mn(2)-N(4)     | 96.90(17)  |
| O(6)#1-Mn(2)-N(4)     | 176.19(17) | O(11)-Mn(2)-O(4)#2    | 93.53(16)  |
| O(1)#3-Mn(2)-O(4)#2   | 142.20(16) | O(6)#1-Mn(2)-O(4)#2   | 87.69(15)  |
| N(4)-Mn(2)-O(4)#2     | 94.06(17)  | O(11)-Mn(2)-O(3)#2    | 149.05(16) |
| O(1)#3-Mn(2)-O(3)#2   | 87.69(16)  | O(6)#1-Mn(2)-O(3)#2   | 90.26(14)  |
| N(4)-Mn(2)-O(3)#2     | 93.52(16)  | O(4)#2-Mn(2)-O(3)#2   | 55.53(13)  |
| O(2)-Mn(3)-O(15)#1    | 100.1(2)   | O(2)-Mn(3)-O(21)      | 107.2(2)   |
| O(15)#1-Mn(3)-O(21)   | 91.4(2)    | O(2)-Mn(3)-O(13)#4    | 149.1(2)   |
| O(15)#1-Mn(3)-O(13)#4 | 99.2(3)    | O(21)-Mn(3)-O(13)#4   | 96.2(2)    |
| O(2)-Mn(3)-O(12)#4    | 94.1(2)    | O(15)#1-Mn(3)-O(12)#4 | 109.1(3)   |
| O(21)-Mn(3)-O(12)#4   | 147.5(3)   | O(13)#4-Mn(3)-O(12)#4 | 56.7(3)    |

Complex 4

|                     |            |                     |            |
|---------------------|------------|---------------------|------------|
| Mn(1)-O(2)#1        | 2.098(3)   | Mn(1)-O(1)#2        | 2.151(3)   |
| Mn(1)-O(3)#3        | 2.180(3)   | Mn(1)-N(4)          | 2.224(3)   |
| Mn(1)-O(4)          | 2.304(3)   | Mn(1)-O(3)          | 2.329(3)   |
| O(2)#1-Mn(1)-O(1)#2 | 168.53(12) | O(2)#1-Mn(1)-O(3)#3 | 89.51(11)  |
| O(1)#2-Mn(1)-O(3)#3 | 85.57(11)  | O(2)#1-Mn(1)-N(4)   | 96.10(12)  |
| O(1)#2-Mn(1)-N(4)   | 94.41(12)  | O(3)#3-Mn(1)-N(4)   | 91.85(12)  |
| O(2)#1-Mn(1)-O(4)   | 102.16(12) | O(1)#2-Mn(1)-O(4)   | 82.98(11)  |
| O(3)#3-Mn(1)-O(4)   | 168.33(11) | N(4)-Mn(1)-O(4)     | 86.81(11)  |
| O(2)#1-Mn(1)-O(3)   | 88.94(11)  | O(1)#2-Mn(1)-O(3)   | 85.39(11)  |
| O(3)#3-Mn(1)-O(3)   | 124.73(6)  | N(4)-Mn(1)-O(3)     | 143.18(11) |
| O(4)-Mn(1)-O(3)     | 56.56(9)   |                     |            |

Symmetry transformations used to generate equivalent atoms: for polymer **1**: #1  $x-1/2, y, -z+1/2$ ; #2  $x, -y+3/2, z$ ; #3  $x+1/2, y, -z+1/2$ ; for polymer **2**: #1  $x+1, y, z$ ; #2  $-x, -y+2, -z+1$ ; #3  $-x+1, -y+1, -z+2$ ; #4  $x-1, y, z$ ; for polymer **3**: #1  $-x+2, -y+2, -z+2$ ; #2  $-x+1, -y+2, -z+2$ ; #3  $x+1, y, z-1$ ; #4  $x-1, y+1, z+1$ ; #5  $x+1, y-1, z-1$ ; #6  $x-1, y, z+1$ ; for

polymer **4**: #1  $x, y-1, z$ ; #2  $-x, -y+1, z+1/2$ ; #3  $-x, -y, z+1/2$ ; #4  $-x, -y+1, z-1/2$ ; #5  
 $x, y+1, z$ ; #6  $-x, -y, z-1/2$ ;
